# Supplementary material
Source: JCI journal article supplement (doi:10.1172/jci195681)
Supplement: sd2 [file 2]

## **Supplementary materials**

**for**

**TCF7L2 Promotes Abdominal Aortic Aneurysm through Smooth Muscle Cell-Mediated  
Extracellular Matrix Remodeling**

Yongjie Deng, Yaozhong Liu, Yang Zhao, Hongyu Liu, Guizhen Zhao, Zhenguo Wang,  
Xu Zhang, Chao Xue, Wei Huang, Tianqing Zhu, Haocheng Lu, Yanhong Guo, Lin Chang,  
Ida Surakka, Y. Eugene Chen, Jifeng Zhang

### **Contents:**

Supplemental Figures 1 through 9.

Supplemental Table 1.

Major Resource Table.

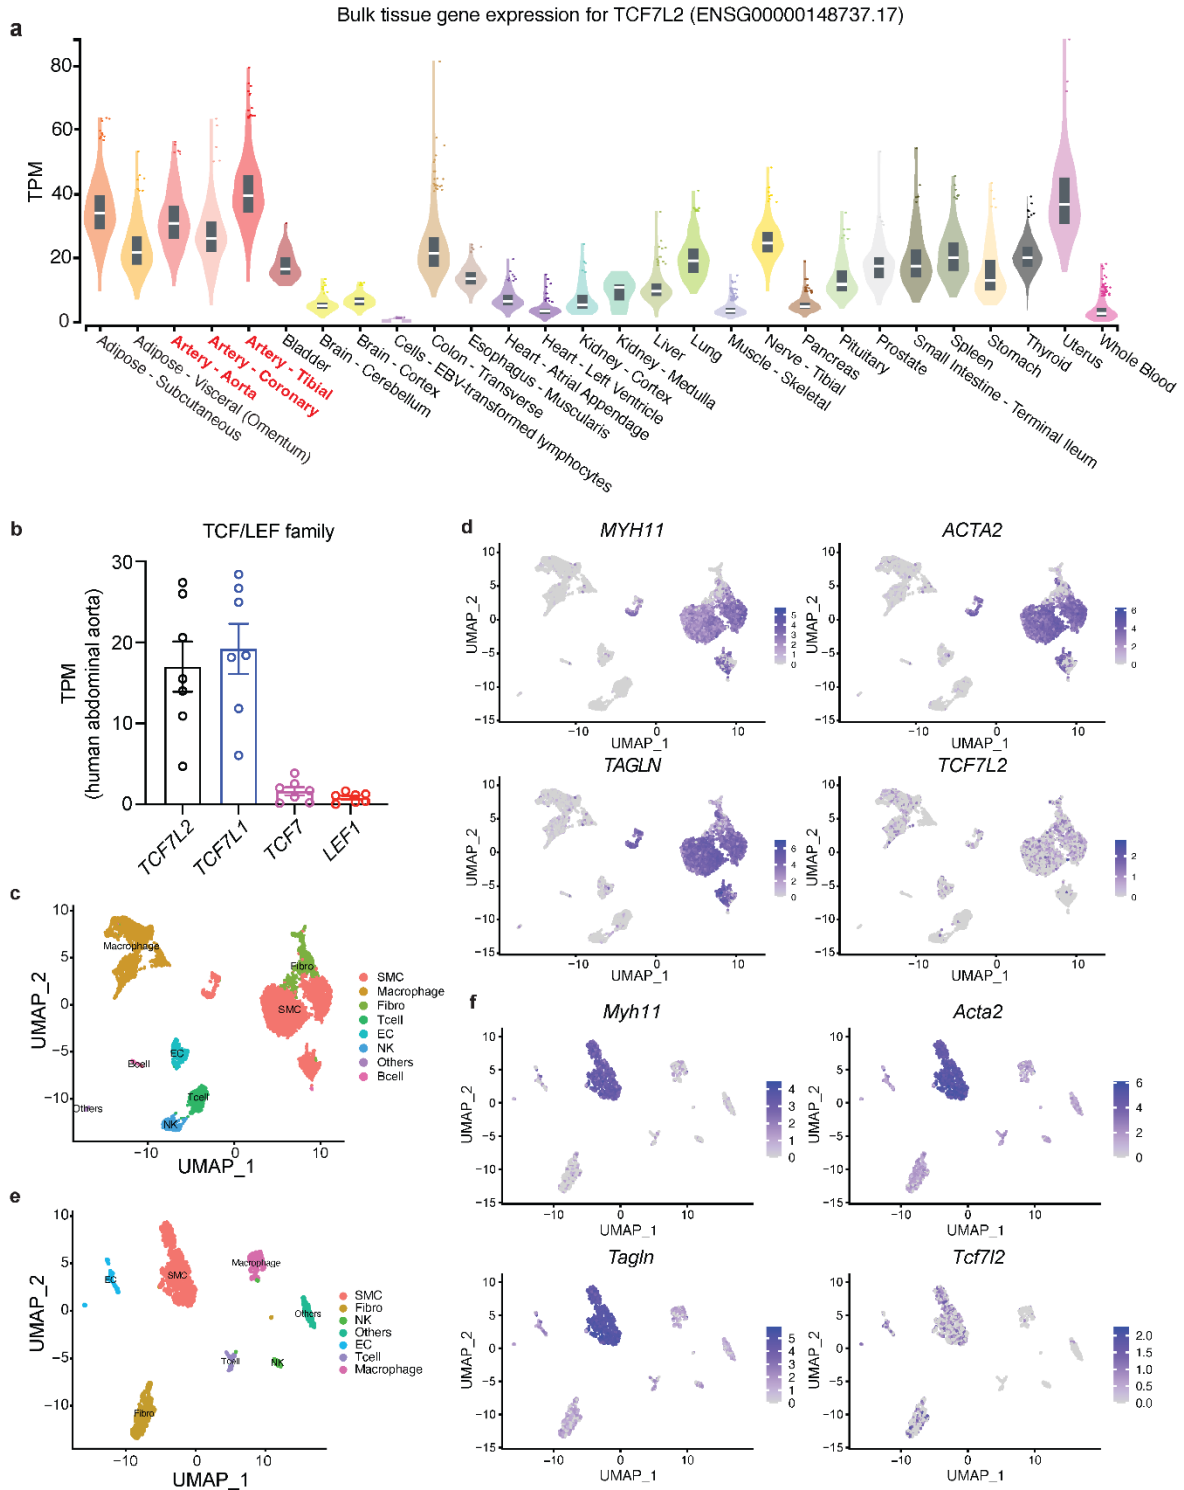

**Supplemental Figure 1. *TCF7L2* is enriched in aortic tissue and vascular smooth muscle cells.**

(a) *TCF7L2* expression across multiple human tissues based on the GTEx bulk RNA-seq dataset. (b) TPM values of TCF/LEF family members from human abdominal aortic bulk RNA-seq of non-aneurysmal donors. (c-f) Clustering and gene expression analysis from

publicly available scRNA-seq datasets. UMAP clustering of human (GSE155468) (**c**) and mouse (GSE152583) aortic cells (**e**). Feature plots of *TCF7L2*, *MYH11*, *ACTA2*, and *TAGLN* expression across human (**d**) and mouse (**f**) aortic cell clusters. Data are presented as mean  $\pm$  SEM.

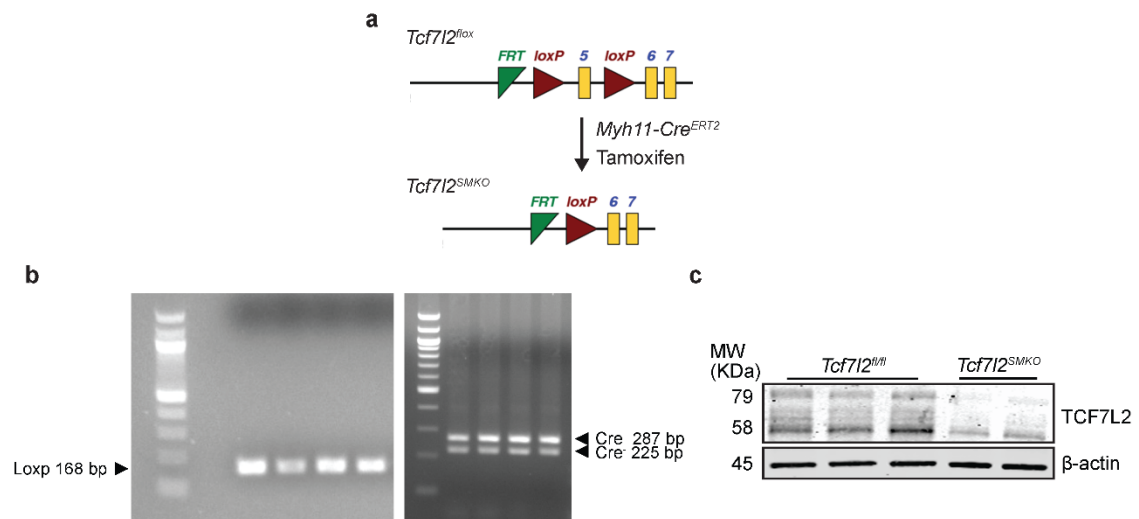

**Supplemental Figure 2. Generation and validation of SMC-specific *Tcf7l2* knockout mice.**

(a) Schematic diagram of the gene targeting strategy to generate smooth muscle cell-specific *Tcf7l2* knockout mice. (b) Genotyping of floxed allele and Cre recombinase by standard PCR. (c) Protein levels of TCF7L2 and  $\beta$ -actin in abdominal aortic tissues from *Tcf7l2<sup>fl/fl</sup>* and *Tcf7l2<sup>SMKO</sup>* mice.

### Ang II model

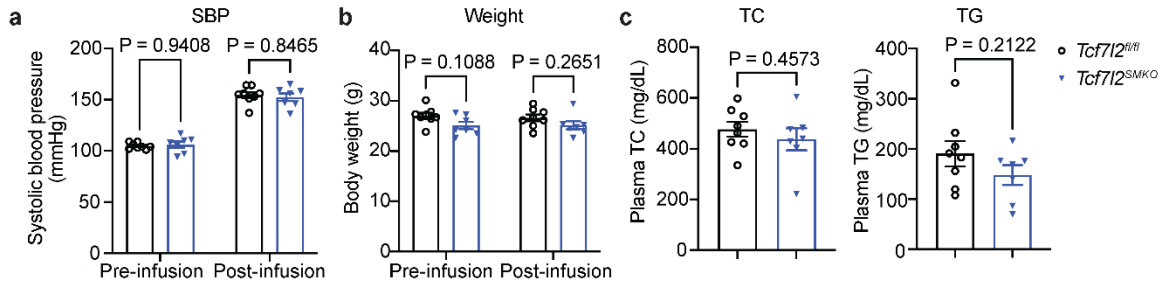

### BAPN/Ang II model

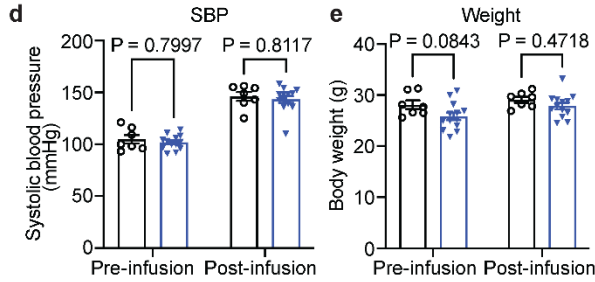

### Elastase model

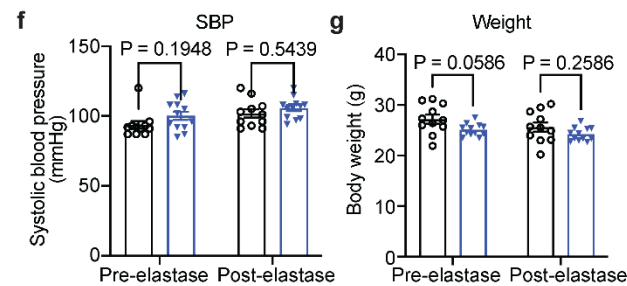

## Supplemental Figure 3. SMC-TCF7L2 deficiency does not affect systemic blood pressure, body weight, or lipid levels across three AAA models.

(a-c) Systolic blood pressure (a), body weight (b), serum total cholesterol (TC) and triglyceride (TG) levels (c) in *Tcf7l2<sup>fl/fl</sup>/Apoe<sup>-/-</sup>* and *Tcf7l2<sup>SMKO</sup>/Apoe<sup>-/-</sup>* mice in the Ang II model. (d-e) Systolic blood pressure (d) and body weight (e) in *Tcf7l2<sup>fl/fl</sup>* and *Tcf7l2<sup>SMKO</sup>* mice in the BAPN/Ang II model. (f-g) Systolic blood pressure (f) and body weight (g) in *Tcf7l2<sup>fl/fl</sup>* and *Tcf7l2<sup>SMKO</sup>* mice in the elastase model. Data are presented as mean  $\pm$  SEM. P values were calculated using 2-way ANOVA followed by Holm-Šidák post hoc analysis (a, b, d, e, f, g) or Student's t test (c).

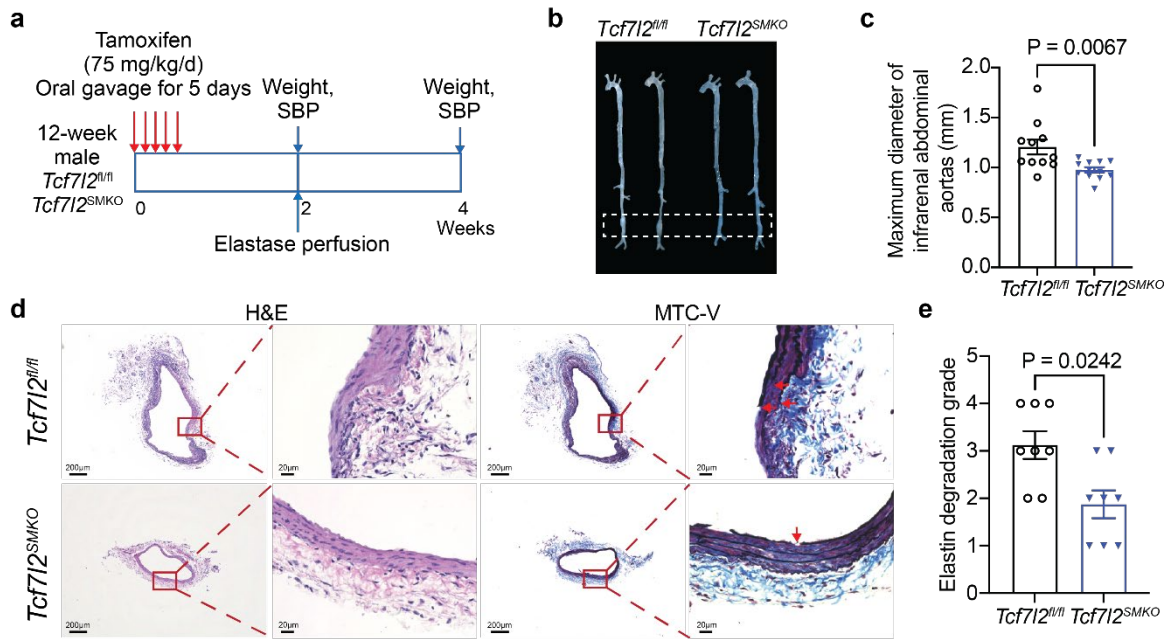

**Supplemental Figure 4. SMC-TCF7L2 deficiency alleviates elastase-induced AAA formation.**

In the elastase-induced AAA model, 12-week-old male *Tcf712<sup>fl/fl</sup>* (n=11) and *Tcf712<sup>SMKO</sup>* (n=12) mice were treated with 30  $\mu$ L elastase applied to the infrarenal abdominal aortas for 30 minutes. (a) Schematic of the elastase-induced AAA model. (b) Representative images showing the morphology of aortas at the endpoint. (c) Maximum diameter of the infrarenal abdominal aorta. (d) Representative images of hematoxylin and eosin (H&E) and Masson's Trichrome-Verhoeff staining (MTC-V) staining of infrarenal abdominal aortas; red arrows indicate elastin degradation. (e) Grade of elastin degradation. Data are presented as mean  $\pm$  SEM. *P* values were calculated using Student's *t* test (c) or Mann-Whitney U test (e).

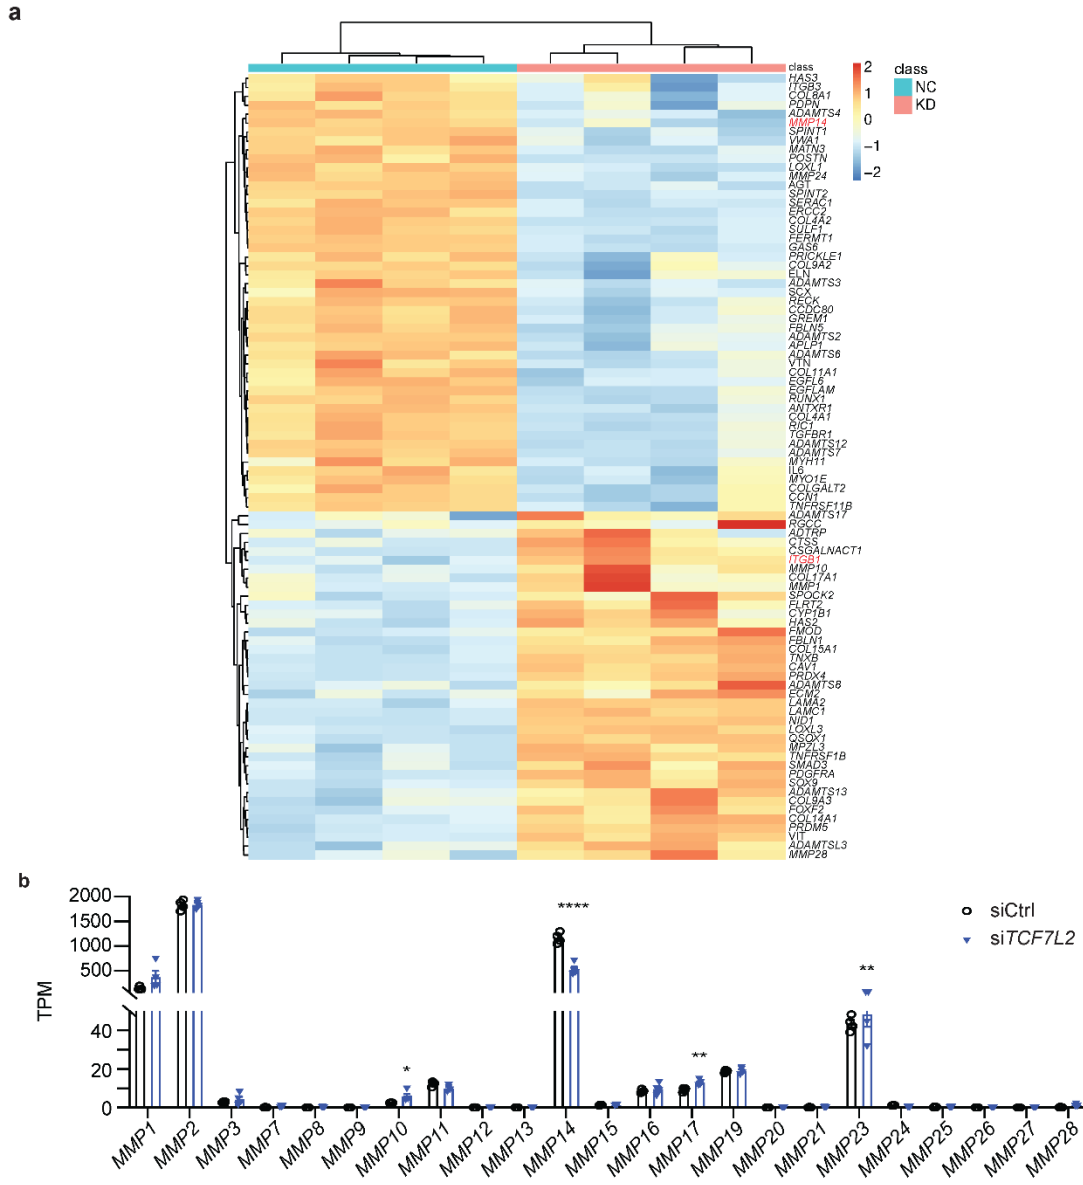

**Supplemental Figure 5. Expression profiling of ECM remodeling genes and MMP family members in HASMCs.**

(a) Heatmap of RNA-seq expression levels of extracellular matrix (ECM) remodeling-associated genes in HASMCs. (b) RNA-seq expression levels of matrix metalloproteinase (MMP) family genes in HASMCs. Data are presented as mean  $\pm$  SEM. *P* values were calculated using Student's *t* test. TPM = transcripts per million.

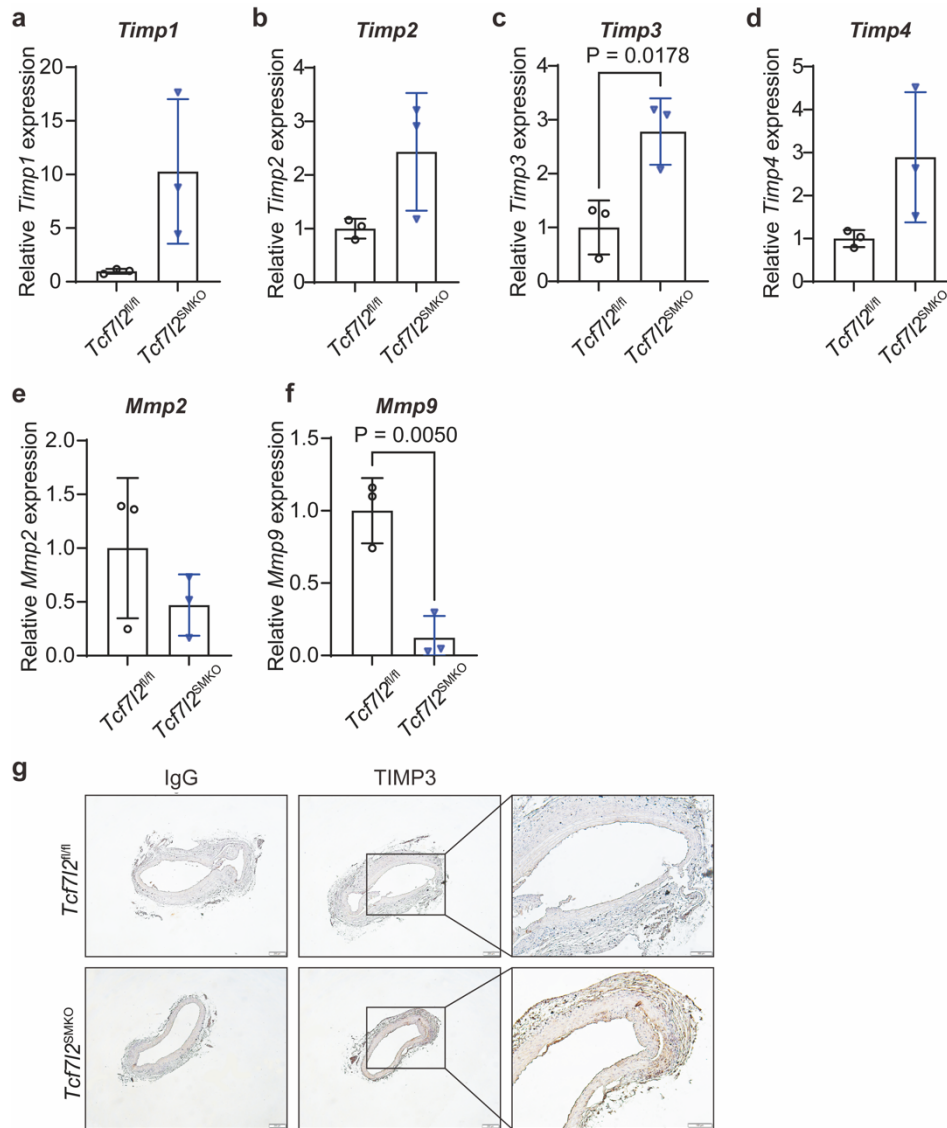

**Supplemental Figure 6. *In vivo* validation of TCF7L2-mediated regulation of TIMPs and MMPs in aortic aneurysmal tissues.**

(a-f) The *Tcf7l2*<sup>SMKO</sup> and floxed control mice were subjected to Ang II-induced AAA. After one week, the RNA was isolated from the abdominal aorta. qRT-PCR analysis of mRNA expression levels of tissue inhibitors of metalloproteinases (*Timp1-4*) and *Mmps* in aortic tissues isolated from *Tcf7l2*<sup>fl/fl</sup> and *Tcf7l2*<sup>SMKO</sup> mice. Data are presented as mean ± SD (n = 3 per group). (g) Representative immunohistochemical (IHC) staining of TIMP3 in aortic cross-sections from *Tcf7l2*<sup>fl/fl</sup> and *Tcf7l2*<sup>SMKO</sup> mice. Isotype-matched IgG was used as a negative control (left panels). Boxed regions are shown at higher magnification in the right panels.

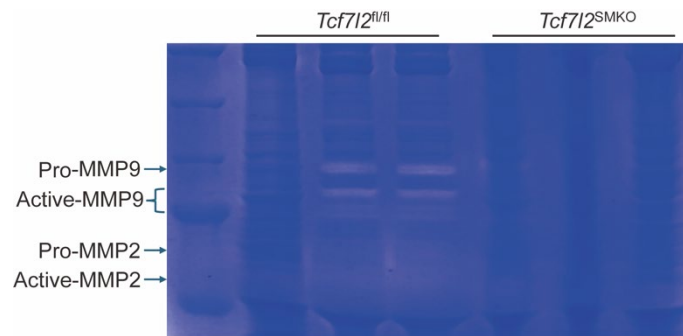

**Supplemental Figure 7. Gelatin zymography of abdominal aorta tissue extracts from *Tcf712<sup>fl/fl</sup>* and *Tcf712<sup>SMKO</sup>* mice.**

The *Tcf712<sup>SMKO</sup>* and floxed control mice were subjected to Ang II-induced AAA. After one week, the protein lysate from abdominal aortic tissue was used to assess MMP activity. Representative gelatin zymography showing bands corresponding to the pro- and active forms of MMP9 (upper region) and MMP2 (lower region).

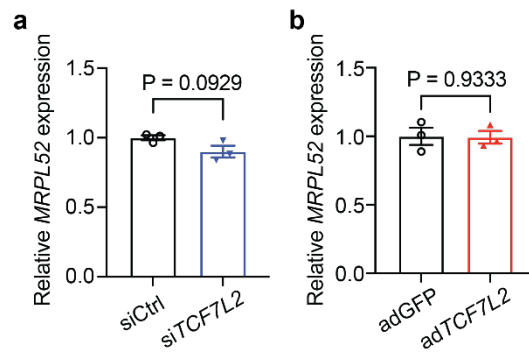

**Supplemental Figure 8. TCF7L2 modulation does not alter *MRPL52* expression.**

Quantification of *MRPL52* mRNA levels in HASMCs transfected with 20 nM siTCF7L2 or siControl (**a**), or infected with 20 MOI AdTCF7L2 or AdGFP (**b**) for 48 hours, followed by serum starvation in Opti-MEM for 24 hours. Data are presented as mean ± SEM. *P* values were calculated using Student's *t* test.

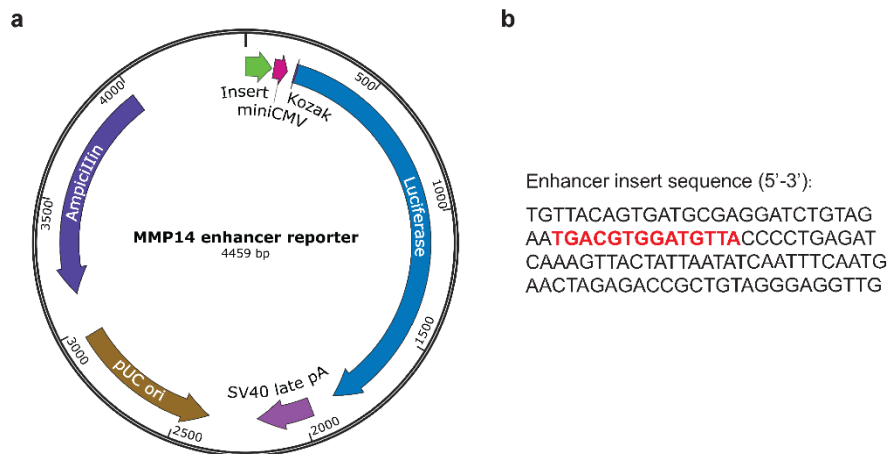

**Supplemental Figure 9. Map of the MMP14 enhancer luciferase reporter construct.**

The plasmid map shows the firefly luciferase reporter construct used in this study, including the mini CMV promoter, luciferase coding sequence, and the inserted enhancer fragment located upstream of MMP14. Vector backbone elements and cloning sites are indicated for reference.

**Supplemental Table 1: qPCR primers used in this study.**

| Primer                | Sequences (5'-3')          |
|-----------------------|----------------------------|
| <i>TCF7L2</i> (human) | F: GAATCGTCCCAGAGTGATGTC   |
|                       | R: ACGACCTTTGCTCTCATTCC    |
| <i>MMP14</i> (human)  | F: GAGCTCAGGGCAGTGGATAG    |
|                       | R: GGTAGCCCGGTTCTACCTTC    |
| <i>TIMP1</i> (human)  | F: AATTCCGACCTCGTCATCAG    |
|                       | R: TGCAGTTTTCCAGCAATGAG    |
| <i>TIMP2</i> (human)  | F: AAGCGGTCAGTGAGAAGGAAG   |
|                       | R: GGGGCCGTGTAGATAAACTCTAT |
| <i>TIMP3</i> (human)  | F: CTGACAGGTCGCGTCTATGA    |
|                       | R: GGCGTAGTGTTTGGACTGGT    |
| <i>TIMP4</i> (human)  | F: CCACTCGGCACTTGTGATTC    |
|                       | R: CATCCTTGACTTTCTCAAACCCT |
| <i>ITGB1</i> (human)  | F: CAAGAGAGCTGAAGACTATCCCA |
|                       | R: TGAAGTCCGAAGTAATCCTCCT  |
| <i>MRPL52</i> (human) | F: GGACTGTTCTTTCAGTGTCCG   |
|                       | R: TCGAAGCTGGCCTTTCATTG    |
| <i>Mmp14</i> (mouse)  | F: CCAAGGCAGCAACTTCAGC     |
|                       | R: GTGAGCGTTGTGTGTGGGTA    |
| <i>MMP14</i> (ChIP)   | F: GAATGACGTGGATGTTACCCC   |
|                       | R: GTCCTCCCAGATTAAGCCGT    |

## Major Resource Table

### Animals

| Species (Mouse)                 | Source                                            | Stock No. | Sex  |
|---------------------------------|---------------------------------------------------|-----------|------|
| <i>Tcf7l2<sup>fl/fl</sup></i>   | International Mouse Phenotyping Consortium (IMPC) | EM:15863  | male |
| <i>Myh11-CreER<sup>T2</sup></i> | The Jackson Laboratory                            | 019079    | male |
| <i>ApoE<sup>-/-</sup></i>       | The Jackson Laboratory                            | 002052    | male |

### Cells

| Strain                                    | Source | Catalog No. |
|-------------------------------------------|--------|-------------|
| Human aortic smooth muscle cells (HASMCs) | Lonza  | CC-2571     |
| A7r5                                      | ATCC   | CRL-1444    |

### Antibodies

| Target antigen | Source                    | Catalog No. | Applications | Working concentration       |
|----------------|---------------------------|-------------|--------------|-----------------------------|
| TCF7L2         | Cell Signaling Technology | 2569        | WB           | 1 µg/mL                     |
| Integrin β1    | Cell Signaling Technology | 4706        | WB           | 1 µg/mL                     |
| β-actin        | Cell Signaling Technology | 3700        | WB           | 0.5 µg/mL                   |
| MMP14          | Abcam                     | ab51074     | IF&WB        | IF, 5 µg/mL;<br>WB, 1 µg/mL |
| TIMP3          | Proteintech               | 10858-1-AP  | WB           | 1 µg/mL                     |

IF, immunofluorescence staining; WB, western blot.

## Reagents

| Reagent          | Source            | Catalog No. | Working concentration |
|------------------|-------------------|-------------|-----------------------|
| Angiotensin II   | Bachem            | 4006473     | 1000 ng/kg/min        |
| BAPN             | Sigma-Aldrich     | A3134       | 150 mg/kg/day         |
| Elastase         | Sigma-Aldrich     | E1250       | 44 units/mL           |
| si <i>TCF7L2</i> | Horizon Discovery | D-003816-01 | 20 nM                 |
| si <i>ITGB1</i>  | Horizon Discovery | L-004506-00 | 20 nM                 |
| siCtrl           | Horizon Discovery | D-001206-14 | 20 nM                 |

## Kits

| Reagent                   | Source                    | Catalog No. |
|---------------------------|---------------------------|-------------|
| Cholesterol E             | Fujifilm Wako             | 999-02601   |
| L-type Triglyceride M     | Fujifilm Wako             | 632-50991   |
| IHC kit                   | Abcam                     | Ab64261     |
| ChIP assay Kit            | Cell Signaling Technology | 9003        |
| MMP activity assay kit    | Abcam                     | Ab112146    |
| Dual-luciferase assay kit | Promega                   | E1910       |
